# Supplementary material for: Based on Network Pharmacology‐Quercetin, a Component of Fuzheng Yiliu Decoction Suppressed Prostate Cancer by Regulating PI3K/AKT Pathway
Source: Hindawi journal article supplement (doi:10.1155/2023/1445953), 2023-01-01
Supplement: f2 [file 1445953.f2.pdf]

### T3\_POS

| Library Hit                                                                | Area     | Height   | Adduct / Charge          |
|----------------------------------------------------------------------------|----------|----------|--------------------------|
| (6aR, 11aR) 3-Hydroxy-9,10-Dimethoxypterocarpan                            | 1.66E+05 | 4.49E+04 | [M+CH3OH+H] <sup>+</sup> |
| 1,2-Dichloroethane                                                         | 2.14E+04 | 3.44E+03 | [M+H] <sup>+</sup>       |
| 15-Hydroxyculmorone                                                        | 8.23E+03 | 2.02E+03 | [M+H] <sup>+</sup>       |
| 2-PROPENOATE                                                               | 9.43E+04 | 1.30E+04 | [M+H] <sup>+</sup>       |
| 2-UNDECANONE                                                               | 4.50E+03 | 6.49E+02 | [M+CH3OH+H] <sup>+</sup> |
| 3'-Aenylic Acid                                                            | 2.92E+04 | 2.66E+03 | [M+H] <sup>+</sup>       |
| 4-COUMARATE                                                                | 5.75E+04 | 5.62E+03 | [M+H] <sup>+</sup>       |
| 5-HYDROXYLYSINE                                                            | 1.04E+05 | 5.36E+03 | [M+H] <sup>+</sup>       |
| 5-Oxo-2-tetrahydrofurancarboxylic acid                                     | 2.82E+04 | 3.13E+03 | [M+H] <sup>+</sup>       |
| 6-PHOSPHOGLUCONATE                                                         | 1.22E+05 | 3.17E+04 | [M+CH3OH+H] <sup>+</sup> |
| 7:3 FTB (7:3 fluorotelomer betaine) (pos)                                  | 4.87E+04 | 5.69E+03 | [M+H] <sup>+</sup>       |
| 7-Ketocholesterol                                                          | 1.04E+05 | 2.11E+04 | [M+H] <sup>+</sup>       |
| Acecarbromal                                                               | 7.49E+04 | 2.25E+04 | [M+H] <sup>+</sup>       |
| Acteoside                                                                  | 2.85E+04 | 7.84E+03 | [M+H] <sup>+</sup>       |
| Adenosine monophosphate                                                    | 1.85E+04 | 2.81E+03 | [M+H] <sup>+</sup>       |
| Alpha-Linolenic acid                                                       | 4.58E+05 | 1.14E+05 | [M+H] <sup>+</sup>       |
| AMINOISOBUTANOATE                                                          | 9.93E+04 | 3.08E+04 | [M+CH3OH+H] <sup>+</sup> |
| Amphetamine                                                                | 1.01E+05 | 6.69E+03 | [M+H] <sup>+</sup>       |
| Androsterone                                                               | 2.19E+05 | 6.57E+04 | [M+H] <sup>+</sup>       |
| a-Nortestosteron                                                           | 4.93E+04 | 8.90E+03 | [M+H] <sup>+</sup>       |
| ARGININE                                                                   | 3.35E+05 | 1.32E+05 | [M+NH4] <sup>+</sup>     |
| BENZOATE                                                                   | 1.58E+05 | 2.68E+04 | [M+H] <sup>+</sup>       |
| BETAINE                                                                    | 1.08E+05 | 3.21E+04 | [M+H] <sup>+</sup>       |
| Beta-sitosterol                                                            | 9.13E+05 | 2.28E+05 | [M+H] <sup>+</sup>       |
| BILIVERDIN                                                                 | 1.46E+05 | 2.03E+04 | [M+H] <sup>+</sup>       |
| Biperiden                                                                  | 7.10E+04 | 1.32E+04 | [M+H] <sup>+</sup>       |
| Bisoprolol                                                                 | 1.14E+05 | 2.32E+04 | [M+H] <sup>+</sup>       |
| Bromacil                                                                   | 2.27E+04 | 6.19E+03 | [M+H] <sup>+</sup>       |
| Bupirone                                                                   | 2.90E+03 | 6.72E+02 | [M+H] <sup>+</sup>       |
| Canavanine                                                                 | 2.31E+05 | 7.53E+04 | [M+H] <sup>+</sup>       |
| Caprolactone                                                               | 3.98E+04 | 6.11E+03 | [M+H] <sup>+</sup>       |
| Chelidonic acid                                                            | 2.20E+04 | 3.94E+03 | [M+H] <sup>+</sup>       |
| Chlorogenic Acid                                                           | 3.99E+05 | 1.01E+05 | [M+H] <sup>+</sup>       |
| CITRAMALATE                                                                | 1.87E+04 | 1.40E+03 | [M+H] <sup>+</sup>       |
| CMAmB-FO (carboxymethyl dimethylammoniumbutyl)- $\beta$ -D-glucopyranoside | 5.21E+03 | 7.20E+02 | [M+NH4] <sup>+</sup>     |
| CORTISOL 21-ACETATE                                                        | 1.95E+05 | 5.65E+04 | [M+H] <sup>+</sup>       |
| Curcumin                                                                   | 3.52E+06 | 8.31E+05 | [M+H] <sup>+</sup>       |
| Cyclovalone                                                                | 9.90E+04 | 2.75E+04 | [M+H] <sup>+</sup>       |
| CYTIDINE DIPHOSPHATE                                                       | 5.42E+04 | 1.42E+04 | [M+NH4] <sup>+</sup>     |
| Danazol                                                                    | 7.35E+05 | 1.61E+05 | [2M+H] <sup>+</sup>      |
| DECANOATE                                                                  | 9.27E+04 | 2.72E+04 | [M+H] <sup>+</sup>       |
| DET                                                                        | 3.00E+04 | 9.18E+03 | [M+H] <sup>+</sup>       |
| Dihydroergocristine                                                        | 1.08E+05 | 2.12E+04 | [M+H] <sup>+</sup>       |
| D-Pantothenic Acid Hemicalcium Salt                                        | 2.18E+04 | 5.17E+03 | [M+H] <sup>+</sup>       |
| Epioxandrolone                                                             | 6.97E+04 | 1.90E+04 | [M+H] <sup>+</sup>       |
| Eremofortin B                                                              | 2.55E+04 | 7.70E+03 | [M+H] <sup>+</sup>       |
| ERUCATE                                                                    | 1.72E+06 | 3.24E+05 | [M+H] <sup>+</sup>       |
| Fluanisone                                                                 | 3.87E+05 | 8.45E+04 | [M] <sup>+</sup>         |
| Formononetin                                                               | 4.01E+05 | 1.18E+05 | [M+H] <sup>+</sup>       |
| GALACTARATE                                                                | 4.92E+04 | 4.14E+03 | [M+H] <sup>+</sup>       |
| GAMMA-LINOLENATE                                                           | 6.89E+04 | 3.03E+03 | [M+NH4] <sup>+</sup>     |
| Glycerophosphocholine                                                      | 1.14E+05 | 3.23E+04 | [M] <sup>+</sup>         |
| Glycyrrhetic acid                                                          | 2.06E+06 | 3.87E+05 | [M+H] <sup>+</sup>       |
| GUANINE                                                                    | 3.09E+04 | 3.12E+03 | [M+H] <sup>+</sup>       |
| Homogentisic acid                                                          | 2.71E+03 | 4.70E+02 | [M+H] <sup>+</sup>       |
| HYPOXANTHINE                                                               | 3.33E+04 | 3.47E+03 | [M+H] <sup>+</sup>       |

|                                           |          |          |                                       |
|-------------------------------------------|----------|----------|---------------------------------------|
| Indoleacrylic acid                        | 1.02E+05 | 2.88E+04 | [M+H] <sup>+</sup>                    |
| INOSINE                                   | 6.25E+02 | 2.83E+02 | [M+H] <sup>+</sup>                    |
| Isonicotinamide                           | 5.58E+03 | 8.29E+02 | [M+H] <sup>+</sup>                    |
| ISOPHORONE                                | 1.85E+04 | 1.81E+03 | [M+H] <sup>+</sup>                    |
| Ketotifen                                 | 4.85E+03 | 9.86E+02 | [M+H] <sup>+</sup>                    |
| Lasalocid A                               | 1.31E+05 | 2.00E+04 | [M+H] <sup>+</sup>                    |
| LEUCINE                                   | 1.92E+05 | 2.61E+04 | [M+H] <sup>+</sup>                    |
| Maltotriose                               | 6.27E+04 | 1.63E+04 | [M+H] <sup>+</sup>                    |
| MESITYL OXIDE                             | 3.86E+03 | 4.05E+02 | [M+H] <sup>+</sup>                    |
| Methyl dihydrojasmonate                   | 1.23E+04 | 3.96E+03 | [M+NH <sub>4</sub> ] <sup>+</sup>     |
| METHYL GALACTOSIDE                        | 5.70E+04 | 1.02E+04 | [M+H] <sup>+</sup>                    |
| Methylinoleate                            | 5.75E+05 | 1.03E+05 | [M+H] <sup>+</sup>                    |
| Mexiletine                                | 1.59E+04 | 1.23E+03 | [M+H] <sup>+</sup>                    |
| N-ACETYLGLUTAMATE                         | 1.82E+05 | 1.45E+04 | [M+H] <sup>+</sup>                    |
| N-Acetyl-L-proline                        | 1.10E+05 | 1.25E+04 | [M+H] <sup>+</sup>                    |
| Neomycin                                  | 1.24E+04 | 2.11E+03 | [M+H] <sup>+</sup>                    |
| N-HOEAmp-FPrSAPS (pos)                    | 6.46E+04 | 1.27E+04 | [M+H] <sup>+</sup>                    |
| NORADRENALINE                             | 9.82E+03 | 2.58E+03 | [M+H] <sup>+</sup>                    |
| NORLEUCINE                                | 3.64E+03 | 1.07E+03 | [M+H] <sup>+</sup>                    |
| Octadecanamide                            | 3.52E+05 | 8.45E+04 | [M+H] <sup>+</sup>                    |
| Octanal_                                  | 2.22E+04 | 3.07E+03 | [M+H] <sup>+</sup>                    |
| OXOPROLINE                                | 3.54E+05 | 3.80E+04 | [M+H] <sup>+</sup>                    |
| PETROSELINATE                             | 7.60E+04 | 2.12E+04 | [M+H] <sup>+</sup>                    |
| PHENYLALANINE                             | 3.20E+05 | 7.26E+04 | [M+NH <sub>4</sub> ] <sup>+</sup>     |
| PHOSPHORIBOSYL PYROPHOSPHATE              | 3.53E+05 | 8.04E+04 | [M] <sup>+</sup>                      |
| PHYLLOQUINONE                             | 1.91E+05 | 3.93E+04 | [M+H] <sup>+</sup>                    |
| PYROGLUTAMATE                             | 6.85E+04 | 7.49E+03 | [2M+H] <sup>+</sup>                   |
| Quercetin                                 | 3.30E+04 | 9.86E+03 | [M+H] <sup>+</sup>                    |
| Raffinose                                 | 1.40E+05 | 4.44E+04 | [M+NH <sub>4</sub> ] <sup>+</sup>     |
| RIBOSE 1,5-BISPHOSPHATE                   | 1.32E+05 | 1.50E+04 | [M+H] <sup>+</sup>                    |
| S-(Methyl)Glutathione                     | 3.06E+04 | 3.67E+03 | [M+K] <sup>+</sup>                    |
| STEARATE                                  | 9.04E+03 | 1.94E+03 | [M+H] <sup>+</sup>                    |
| Tiglic acid                               | 1.11E+04 | 1.35E+03 | [M+CH <sub>3</sub> OH+H] <sup>+</sup> |
| Trichodermin                              | 1.56E+05 | 1.95E+04 | [M+H] <sup>+</sup>                    |
| TRIMETHYLAMINE                            | 4.75E+04 | 3.91E+03 | [M+H] <sup>+</sup>                    |
| TYROSINE                                  | 1.69E+05 | 1.65E+04 | [M+NH <sub>4</sub> ] <sup>+</sup>     |
| URACIL                                    | 7.30E+04 | 5.96E+03 | [M+H] <sup>+</sup>                    |
| URIDINE                                   | 6.74E+04 | 6.76E+03 | [M+H] <sup>+</sup>                    |
| URIDINE TRIPHOSPHATE                      | 3.41E+05 | 9.00E+04 | [M+H] <sup>+</sup>                    |
| URSODEOXYCHOLATE                          | 1.16E+06 | 3.02E+05 | [M+NH <sub>4</sub> ] <sup>+</sup>     |
| Uvaol                                     | 1.71E+05 | 4.26E+04 | [M+H] <sup>+</sup>                    |
| XANTHINE                                  | 3.91E+04 | 4.13E+03 | [M+H] <sup>+</sup>                    |
| Ziprasidone                               | 7.59E+04 | 1.73E+04 | [M+H] <sup>+</sup>                    |
| Betulin                                   | 2.08E+04 | 5.52E+03 | [M+H] <sup>+</sup>                    |
| Dictamnine                                | 8.78E+04 | 2.68E+04 | [M+H] <sup>+</sup>                    |
| Patchouli alcohol (loss H <sub>2</sub> O) | 2.01E+04 | 3.29E+03 | [M+H] <sup>+</sup>                    |
| Cytidine                                  | 1.83E+04 | 1.93E+03 | [M+H] <sup>+</sup>                    |
| Baohuoside I                              | 8.48E+06 | 2.09E+06 | [M+H] <sup>+</sup>                    |
| Epimedin B                                | 7.30E+06 | 2.07E+06 | [M+H] <sup>+</sup>                    |
| Epimedin A                                | 1.89E+06 | 4.86E+05 | [M+H] <sup>+</sup>                    |
| Epimedin C                                | 1.21E+07 | 3.03E+06 | [M] <sup>+</sup>                      |
| Nobiletin                                 | 3.09E+04 | 8.32E+03 | [M+H] <sup>+</sup>                    |
| Dihydratanshinone I                       | 5.02E+04 | 1.32E+04 | [M+H] <sup>+</sup>                    |
| Liquiritin                                | 4.70E+05 | 7.99E+04 | [M+H] <sup>+</sup>                    |
| Glycyrrhizic acid ammonium salt           | 8.66E+06 | 1.54E+06 | [M+H] <sup>+</sup>                    |
| Pratensein-7-O-glucoside                  | 5.54E+03 | 8.41E+02 | [M+H] <sup>+</sup>                    |
| Trigonelline                              | 1.15E+05 | 3.55E+04 | [M+Na] <sup>+</sup>                   |
| quercetin-3'-O-glucoside                  | 1.02E+05 | 1.23E+04 | [M+H] <sup>+</sup>                    |

|                                               |          |          |                      |
|-----------------------------------------------|----------|----------|----------------------|
| Phellodendrine                                | 1.70E+07 | 4.10E+06 | [M+NH4] <sup>+</sup> |
| Obacunone                                     | 1.68E+06 | 4.75E+05 | [M+H] <sup>+</sup>   |
| Tigogenin                                     | 5.85E+05 | 1.02E+05 | [M+H] <sup>+</sup>   |
| Hyperin                                       | 1.88E+05 | 3.74E+04 | [M+H] <sup>+</sup>   |
| Rutin                                         | 2.93E+05 | 8.57E+04 | [M+H] <sup>+</sup>   |
| Ruscogenin                                    | 3.16E+04 | 6.34E+03 | [M+H] <sup>+</sup>   |
| Betulonicacid                                 | 1.22E+05 | 1.69E+04 | [M+H] <sup>+</sup>   |
| Ononin                                        | 1.48E+06 | 4.16E+05 | [M+H] <sup>+</sup>   |
| mangiferin                                    | 1.80E+06 | 4.60E+05 | [M+K] <sup>+</sup>   |
| Acteoside +NH3                                | 2.74E+04 | 7.29E+03 | [M+NH4] <sup>+</sup> |
| Calycosin                                     | 4.94E+05 | 1.40E+05 | [M+H] <sup>+</sup>   |
| calycosin-7-o-glucoside                       | 3.18E+06 | 9.70E+05 | [M+H] <sup>+</sup>   |
| linarin                                       | 5.94E+05 | 1.77E+05 | [M] <sup>+</sup>     |
| Luteolin-7-O-β-D-glucuronide                  | 1.32E+05 | 3.73E+04 | [M+H] <sup>+</sup>   |
| Pseuoginsenoside F11                          | 1.18E+06 | 3.32E+05 | [M+NH4] <sup>+</sup> |
| guanosine                                     | 1.40E+05 | 4.32E+04 | [M+H] <sup>+</sup>   |
| Limonin                                       | 5.09E+06 | 1.41E+06 | [M+H] <sup>+</sup>   |
| Arctigenin                                    | 3.60E+03 | 7.54E+02 | [M] <sup>+</sup>     |
| Proline                                       | 4.14E+05 | 1.30E+05 | [M+H] <sup>+</sup>   |
| Hydroxygenkwanin                              | 4.98E+02 | 1.45E+02 | [M+H] <sup>+</sup>   |
| Apigenin 7-O-beta-D-glucuronide               | 1.29E+04 | 3.31E+03 | [M] <sup>+</sup>     |
| Deacetyl asperulosidic acid methyl ester +NH3 | 1.25E+05 | 2.36E+04 | [M+H] <sup>+</sup>   |
| 10-Deacetylasperulosidic acid +NH3            | 2.81E+05 | 2.33E+04 | [M] <sup>+</sup>     |
| Cistanoside D +NH4                            | 7.44E+03 | 2.37E+03 | [M+H] <sup>+</sup>   |
| Aempferol-3-O-rutinoside                      | 3.31E+04 | 9.49E+03 | [M+H] <sup>+</sup>   |
| Diosgenin                                     | 2.46E+05 | 6.04E+04 | [M+H] <sup>+</sup>   |
| Echinacoside +NH3                             | 1.50E+04 | 4.91E+03 | [M+H] <sup>+</sup>   |
| Dehydrocorydaline                             | 1.15E+05 | 3.17E+04 | [M+H] <sup>+</sup>   |
| Vitamin B2                                    | 5.33E+04 | 1.49E+04 | [M+H] <sup>+</sup>   |
| Vitamin D2                                    | 2.16E+04 | 4.44E+03 | [M+H] <sup>+</sup>   |
| Schaftoside                                   | 9.57E+05 | 2.14E+05 | [M] <sup>+</sup>     |
| Adenosine                                     | 7.62E+03 | 2.76E+03 | [M] <sup>+</sup>     |
| Adenine                                       | 9.38E+04 | 2.82E+04 | [M+H] <sup>+</sup>   |
| Berberrubine                                  | 7.03E+05 | 2.27E+05 | [M+H] <sup>+</sup>   |
| Methyl linoleate                              | 4.15E+05 | 7.73E+04 | [M+H] <sup>+</sup>   |
| Palmatine chloride                            | 5.23E+06 | 1.44E+06 | [M+H] <sup>+</sup>   |
| Stachydrine hydrochloride                     | 1.56E+05 | 2.77E+04 | [M+H] <sup>+</sup>   |
| Berberine hydrochloride                       | 6.44E+07 | 1.23E+07 | [M] <sup>+</sup>     |
| 3-N-butyl-4,5-dihydrophthalide                | 3.66E+04 | 3.06E+03 | [M+H] <sup>+</sup>   |
| Jatrorrhizine                                 | 4.55E+06 | 1.08E+06 | [M+H] <sup>+</sup>   |
| Rhoifolin                                     | 8.00E+04 | 1.94E+04 | [M+H] <sup>+</sup>   |
| Isoliquiritin                                 | 1.35E+06 | 4.62E+05 | [M+H] <sup>+</sup>   |
| Isoliquiritigenin                             | 4.40E+05 | 1.08E+05 | [M+H] <sup>+</sup>   |
| Isoliensinine                                 | 2.09E+05 | 5.93E+04 | [M] <sup>+</sup>     |
| Isoalantolactone                              | 6.89E+03 | 2.30E+03 | [M+H] <sup>+</sup>   |
| Leonurine                                     | 1.66E+04 | 3.54E+03 | [M+H] <sup>+</sup>   |
| Icarrin                                       | 3.13E+07 | 8.04E+06 | [M+H] <sup>+</sup>   |
| Cryptotanshinone                              | 8.08E+04 | 2.07E+04 | [M+H] <sup>+</sup>   |
| Polygalaxanthone VI +Na                       | 6.93E+05 | 2.03E+05 | [M+H] <sup>+</sup>   |
| Sarsasapogenin                                | 1.07E+06 | 2.14E+05 | [M+H] <sup>+</sup>   |
| SHIONONE                                      | 1.41E+04 | 2.81E+03 | [M+H] <sup>+</sup>   |
| Astragalin                                    | 5.77E+04 | 1.51E+04 | [M+H] <sup>+</sup>   |

| Precursor Mass | Component Name                            | Found At Mass |
|----------------|-------------------------------------------|---------------|
| 301.108        | 301.1075 / 10.24 [M+CH3OH+H] <sup>+</sup> | 301.1078      |
| 100.075        | 100.0752 / 18.60                          | 100.0755      |
| 253.18         | 253.1800 / 10.87                          | 253.1802      |
| 72.936         | 72.9362 / 19.69                           | 72.937        |
| 171.029        | 171.0289 / 4.10 [M+CH3OH+H] <sup>+</sup>  | 171.029       |
| 348.071        | 348.0707 / 3.57                           | 348.0706      |
| 165.054        | 165.0545 / 3.18 [M+H] <sup>+</sup>        | 165.0546      |
| 163.133        | 163.1331 / 1.48 [M+H] <sup>+</sup>        | 163.133       |
| 131.052        | 131.0524 / 2.31                           | 131.0525      |
| 309.207        | 309.2065 / 10.49 [M+CH3OH+H] <sup>+</sup> | 309.2065      |
| 514.225        | 514.2248 / 5.02                           | 514.2251      |
| 401.341        | 401.3413 / 17.92                          | 401.3416      |
| 279.232        | 279.2325 / 11.87                          | 279.2327      |
| 625.212        | 625.2117 / 7.33 [M+H] <sup>+</sup>        | 625.2123      |
| 348.071        | 348.0706 / 2.17                           | 348.0704      |
| 279.233        | 279.2327 / 13.07                          | 279.2328      |
| 104.106        | 104.1065 / 0.96 [M+CH3OH+H] <sup>+</sup>  | 104.1066      |
| 136.075        | 136.0751 / 1.93                           | 136.0753      |
| 291.196        | 291.1960 / 10.49                          | 291.1958      |
| 275.201        | 275.2009 / 11.18                          | 275.2008      |
| 175.119        | 175.1192 / 0.93 [M+NH4] <sup>+</sup>      | 175.1193      |
| 122.964        | 122.9639 / 19.64                          | 122.9638      |
| 118.086        | 118.0858 / 1.01                           | 118.0857      |
| 415.211        | 415.2114 / 11.73 [M+H] <sup>+</sup>       | 415.2115      |
| 583.294        | 583.2943 / 1.37                           | 583.2941      |
| 312.326        | 312.3264 / 18.46                          | 312.3265      |
| 326.379        | 326.3792 / 12.60                          | 326.3795      |
| 261.112        | 261.1124 / 10.84                          | 261.1121      |
| 386.342        | 386.3417 / 17.28                          | 386.3413      |
| 177.087        | 177.0869 / 1.12 [M+H] <sup>+</sup>        | 177.0869      |
| 114.988        | 114.9876 / 0.72                           | 114.9876      |
| 185.115        | 185.1148 / 17.52                          | 185.1148      |
| 355.103        | 355.1030 / 6.25                           | 355.1028      |
| 149.023        | 149.0233 / 1.48                           | 149.0233      |
| 578.282        | 578.2818 / 6.73 [M+NH4] <sup>+</sup>      | 578.2915      |
| 405.351        | 405.3508 / 7.97                           | 405.3511      |
| 369.118        | 369.1182 / 6.88                           | 369.1183      |
| 367.118        | 367.1179 / 11.91                          | 367.1179      |
| 404.207        | 404.2066 / 10.90 [M+NH4] <sup>+</sup>     | 404.2065      |
| 675.677        | 675.6761 / 18.17 [2M+H] <sup>+</sup>      | 675.6767      |
| 173.117        | 173.1171 / 9.60                           | 173.1172      |
| 217.097        | 217.0971 / 6.30                           | 217.0974      |
| 612.328        | 612.3276 / 5.21 [M+H] <sup>+</sup>        | 612.3267      |
| 220.118        | 220.1181 / 5.32 [M+H] <sup>+</sup>        | 220.118       |
| 307.19         | 307.1897 / 11.02                          | 307.1899      |
| 249.148        | 249.1483 / 11.33                          | 249.1482      |
| 339.347        | 339.3472 / 18.11                          | 339.3463      |
| 357.169        | 357.1694 / 11.06 [M] <sup>+</sup>         | 357.1694      |
| 269.081        | 269.0810 / 10.06 [M+H] <sup>+</sup>       | 269.0809      |
| 211.06         | 211.0600 / 4.74                           | 211.0602      |
| 279.159        | 279.1593 / 1.48 [M+NH4] <sup>+</sup>      | 279.1592      |
| 258.11         | 258.1100 / 0.96 [M] <sup>+</sup>          | 258.1102      |
| 471.347        | 471.3468 / 9.98 [M+H] <sup>+</sup>        | 471.3469      |
| 152.056        | 152.0564 / 1.81                           | 152.0564      |
| 169.014        | 169.0135 / 3.17                           | 169.0136      |
| 137.045        | 137.0450 / 2.46                           | 137.0454      |

|         |                                                       |          |
|---------|-------------------------------------------------------|----------|
| 188.07  | 188.0704 / 5.73 [M+H] <sup>+</sup>                    | 188.0705 |
| 269.107 | 269.1073 / 2.60 [M+H] <sup>+</sup>                    | 269.1072 |
| 123.055 | 123.0551 / 2.16                                       | 123.0546 |
| 139.002 | 139.0023 / 3.50                                       | 139.0024 |
| 310.311 | 310.3114 / 17.58                                      | 310.3113 |
| 613.482 | 613.4824 / 17.66                                      | 613.4825 |
| 132.102 | 132.1018 / 3.02                                       | 132.1019 |
| 505.195 | 505.1950 / 4.99 [M+H] <sup>+</sup>                    | 505.1948 |
| 99.044  | 99.0439 / 5.00 [M+H] <sup>+</sup>                     | 99.0438  |
| 244.191 | 244.1907 / 9.53 [M+NH <sub>4</sub> ] <sup>+</sup>     | 244.1906 |
| 195.138 | 195.1379 / 9.58                                       | 195.138  |
| 295.226 | 295.2264 / 9.59                                       | 295.2269 |
| 180.102 | 180.1020 / 3.29                                       | 180.1016 |
| 190.071 | 190.0712 / 1.72                                       | 190.0711 |
| 158.093 | 158.0925 / 2.65                                       | 158.0924 |
| 615.497 | 615.4974 / 18.61                                      | 615.4962 |
| 501.321 | 501.3211 / 10.25                                      | 501.3208 |
| 170.081 | 170.0812 / 5.58                                       | 170.0813 |
| 132.102 | 132.1019 / 2.40                                       | 132.1017 |
| 284.295 | 284.2951 / 16.94                                      | 284.2953 |
| 129.018 | 129.0180 / 2.13                                       | 129.018  |
| 130.05  | 130.0499 / 2.41 [M+H] <sup>+</sup>                    | 130.0499 |
| 282.278 | 282.2781 / 15.66                                      | 282.2793 |
| 166.086 | 166.0864 / 5.06 [M+NH <sub>4</sub> ] <sup>+</sup>     | 166.0863 |
| 391.284 | 391.2842 / 17.57 [M] <sup>+</sup>                     | 391.2844 |
| 451.32  | 451.3197 / 9.62                                       | 451.3206 |
| 259.094 | 259.0931 / 2.40 [2M+H] <sup>+</sup>                   | 259.093  |
| 303.051 | 303.0505 / 6.68                                       | 303.0506 |
| 522.202 | 522.2025 / 1.03 [M+NH <sub>4</sub> ] <sup>+</sup>     | 522.2032 |
| 311.222 | 311.2217 / 11.17                                      | 311.2215 |
| 322.077 | 322.0771 / 2.18 [M+K] <sup>+</sup>                    | 322.0772 |
| 285.298 | 285.2980 / 16.66                                      | 285.2986 |
| 101.022 | 101.0224 / 2.06 [M+CH <sub>3</sub> OH+H] <sup>+</sup> | 101.0224 |
| 293.211 | 293.2106 / 9.24                                       | 293.2106 |
| 60.044  | 60.0440 / 17.84                                       | 60.0441  |
| 182.081 | 182.0813 / 3.17 [M+NH <sub>4</sub> ] <sup>+</sup>     | 182.0814 |
| 113.034 | 113.0340 / 1.67                                       | 113.034  |
| 245.077 | 245.0770 / 3.45                                       | 245.0772 |
| 485.326 | 485.3260 / 11.34                                      | 485.3261 |
| 393.285 | 393.2854 / 11.51 [M+NH <sub>4</sub> ] <sup>+</sup>    | 393.2857 |
| 443.388 | 443.3878 / 9.13                                       | 443.3876 |
| 153.04  | 153.0402 / 1.43                                       | 153.0401 |
| 413.266 | 413.2664 / 17.56                                      | 413.2665 |
| 443.388 | 443.3879 / 12.74                                      | 443.3878 |
| 200.07  | 200.0700 / 10.26                                      | 200.0701 |
| 205.086 | 205.0858 / 18.43                                      | 205.0862 |
| 244.093 | 244.0927 / 1.78                                       | 244.0927 |
| 515.191 | 515.1909 / 10.82                                      | 515.1912 |
| 809.287 | 809.2868 / 8.37                                       | 809.2868 |
| 839.296 | 839.2964 / 8.28 [M+H] <sup>+</sup>                    | 839.2966 |
| 823.302 | 823.3018 / 8.44 [M] <sup>+</sup>                      | 823.3011 |
| 403.139 | 403.1390 / 10.93                                      | 403.139  |
| 279.102 | 279.1024 / 12.24                                      | 279.1025 |
| 419.134 | 419.1337 / 7.14 [M+H] <sup>+</sup>                    | 419.134  |
| 823.412 | 823.4116 / 9.97                                       | 823.4122 |
| 463.255 | 463.2549 / 6.76                                       | 463.2511 |
| 138.054 | 138.0541 / 1.11 [M+Na] <sup>+</sup>                   | 138.0547 |
| 465.208 | 465.2079 / 2.85                                       | 465.2077 |

|         |                                      |          |
|---------|--------------------------------------|----------|
| 342.17  | 342.1704 / 6.35 [M+NH4] <sup>+</sup> | 342.1705 |
| 455.206 | 455.2060 / 11.45 [M+H] <sup>+</sup>  | 455.2063 |
| 417.336 | 417.3361 / 8.96                      | 417.3364 |
| 465.103 | 465.1026 / 7.19                      | 465.1028 |
| 611.161 | 611.1612 / 7.04                      | 611.1607 |
| 431.179 | 431.1791 / 18.41                     | 431.1791 |
| 455.351 | 455.3514 / 8.99                      | 455.3518 |
| 431.133 | 431.1328 / 8.14 [M+H] <sup>+</sup>   | 431.1326 |
| 423.092 | 423.0923 / 6.46 [M+K] <sup>+</sup>   | 423.0924 |
| 642.239 | 642.2386 / 7.34 [M+NH4] <sup>+</sup> | 642.2406 |
| 285.076 | 285.0758 / 8.77                      | 285.0758 |
| 447.128 | 447.1282 / 7.15 [M+H] <sup>+</sup>   | 447.1283 |
| 593.187 | 593.1871 / 8.34 [M] <sup>+</sup>     | 593.1862 |
| 463.087 | 463.0868 / 7.30                      | 463.087  |
| 801.499 | 801.4993 / 9.09 [M+NH4] <sup>+</sup> | 801.4995 |
| 284.1   | 284.0998 / 4.85 [M+H] <sup>+</sup>   | 284.0993 |
| 471.202 | 471.2016 / 10.45                     | 471.2014 |
| 373.128 | 373.1277 / 9.93 [M] <sup>+</sup>     | 373.1321 |
| 116.07  | 116.0702 / 1.08 [M+H] <sup>+</sup>   | 116.0703 |
| 301.216 | 301.2164 / 8.69                      | 301.2134 |
| 447.092 | 447.0915 / 8.10 [M] <sup>+</sup>     | 447.0917 |
| 422.166 | 422.1656 / 5.53                      | 422.1661 |
| 408.15  | 408.1505 / 4.73 [M] <sup>+</sup>     | 408.1507 |
| 670.271 | 670.2709 / 8.09                      | 670.2701 |
| 595.166 | 595.1657 / 7.35                      | 595.1652 |
| 415.321 | 415.3205 / 10.77                     | 415.3206 |
| 804.293 | 804.2929 / 6.44                      | 804.2931 |
| 366.171 | 366.1706 / 8.46                      | 366.1704 |
| 377.147 | 377.1466 / 6.51                      | 377.1458 |
| 397.381 | 397.3814 / 19.51                     | 397.3831 |
| 565.156 | 565.1556 / 6.67 [M] <sup>+</sup>     | 565.1559 |
| 268.105 | 268.1046 / 2.61 [M] <sup>+</sup>     | 268.1043 |
| 136.062 | 136.0615 / 1.32                      | 136.0614 |
| 322.107 | 322.1072 / 7.96                      | 322.1074 |
| 295.227 | 295.2266 / 13.42                     | 295.2275 |
| 352.118 | 352.1185 / 7.44                      | 352.1184 |
| 144.102 | 144.1018 / 1.23 [M+H] <sup>+</sup>   | 144.1017 |
| 336.122 | 336.1224 / 8.14 [M] <sup>+</sup>     | 336.1223 |
| 193.049 | 193.0493 / 4.71 [M+H] <sup>+</sup>   | 193.0493 |
| 338.139 | 338.1392 / 7.79 [M+H] <sup>+</sup>   | 338.1393 |
| 579.17  | 579.1698 / 7.49                      | 579.1703 |
| 419.133 | 419.1332 / 8.07 [M+H] <sup>+</sup>   | 419.1332 |
| 257.081 | 257.0808 / 7.17                      | 257.0807 |
| 611.325 | 611.3253 / 5.20 [M] <sup>+</sup>     | 611.3253 |
| 233.154 | 233.1544 / 12.34                     | 233.1539 |
| 312.326 | 312.3260 / 17.94                     | 312.3261 |
| 677.244 | 677.2438 / 8.59                      | 677.2435 |
| 297.148 | 297.1483 / 13.28                     | 297.1489 |
| 517.17  | 517.1703 / 8.91                      | 517.1706 |
| 417.336 | 417.3363 / 11.84                     | 417.3362 |
| 427.356 | 427.3561 / 18.07                     | 427.3569 |
| 449.108 | 449.1076 / 7.26                      | 449.1075 |

### T3\_NEG

| Library Hit                                                  | Area     | Height   |
|--------------------------------------------------------------|----------|----------|
| (-)-Syringaresnol-4-O-β-D-apiofuranosyl-(1→2)-β-D-glucopyran | 8.40E+04 | 2.34E+04 |
| (S)-(-)-2-Hydroxyisocaproic Acid                             | 5.65E+04 | 1.11E+04 |
| 1,11-Undecanedicarboxylic acid                               | 7.07E+05 | 1.89E+05 |
| 1,4-Dicaffeoylquinic Acid (Cynarin)                          | 1.33E+05 | 2.10E+04 |
| 10-hydroxydec-2-enoic acid                                   | 1.43E+05 | 4.38E+04 |
| 11a-Hydroxyprogesterone                                      | 1.50E+06 | 4.14E+05 |
| Acetyl-11-keto-β-boswellic acid                              | 3.99E+04 | 9.99E+03 |
| 17a-Ethynylestradiol                                         | 7.49E+04 | 7.29E+03 |
| 1-AMINOCYCLOPROPANECARBOXYLATE                               | 1.24E+04 | 2.26E+03 |
| 2',4'-DIHYDROXYACETOPHENONE                                  | 4.99E+04 | 1.48E+04 |
| 2,4-Di-tert-butylphenol                                      | 2.80E+04 | 7.34E+03 |
| 20(R)-Ginsenoside Rh1 +HCOOH                                 | 2.06E+05 | 6.51E+04 |
| 20(S)Ginsenoside Rg3 +HCOOH                                  | 1.15E+06 | 3.18E+05 |
| 2-Hydroxy-2-methylbutyric acid                               | 2.32E+04 | 6.59E+03 |
| 2-Hydroxyoctanoic acid                                       | 2.06E+05 | 6.77E+04 |
| 2-Isopropylmalic acid                                        | 6.69E+05 | 1.53E+05 |
| 2-Pyrocatechuic acid                                         | 1.24E+05 | 2.76E+04 |
| 3-(4-Hydroxyphenyl)-Propionic Acid                           | 3.74E+06 | 8.35E+05 |
| 3,4 DIHYDROXYMANDELATE                                       | 4.81E+05 | 1.52E+05 |
| 3-DEHYDROSHIKIMATE                                           | 3.19E+04 | 9.31E+03 |
| 3-HYDROXYMETHYLGLUTARATE                                     | 2.91E+05 | 2.03E+04 |
| 3-Methylthiophene                                            | 4.18E+04 | 5.37E+03 |
| 4-Bromophenylalanine                                         | 2.34E+05 | 7.31E+04 |
| 4-COUMARATE                                                  | 2.07E+06 | 6.13E+05 |
| 4-HYDROXYBENZALDEHYDE                                        | 2.50E+05 | 7.56E+04 |
| 4-HYDROXYBENZOATE                                            | 3.52E+05 | 8.86E+04 |
| 4-Hydroxycoumarin                                            | 3.78E+04 | 1.08E+04 |
| 5-Oxo-2-tetrahydrofuran carboxylic acid                      | 1.48E+04 | 1.75E+03 |
| 4'-O-β-Glucopyranosyl-5-O-methylvisamminol +HCOOH            | 6.01E+05 | 1.56E+05 |
| 6-CARBOXYHEXANOATE                                           | 4.36E+04 | 1.33E+04 |
| Acteoside                                                    | 8.96E+05 | 2.71E+05 |
| ADENOSINE 2',3'-CYCLIC PHOSPHATE                             | 1.24E+05 | 9.39E+03 |
| ADIPATE                                                      | 3.34E+04 | 7.80E+03 |
| Aflatoxin P1                                                 | 1.03E+04 | 3.00E+03 |
| ARACHIDATE                                                   | 3.91E+04 | 3.41E+03 |
| Arachidonic acid                                             | 5.06E+04 | 1.49E+04 |
| ASPARAGINE                                                   | 2.26E+05 | 8.65E+04 |
| AZELATE                                                      | 3.43E+06 | 1.01E+06 |
| BETA-GLYCEROPHOSPHATE                                        | 1.04E+05 | 2.50E+04 |
| Biopterin                                                    | 2.53E+04 | 6.17E+03 |
| Caffeic acid                                                 | 4.68E+05 | 1.47E+05 |
| Chlorogenic Acid                                             | 7.27E+05 | 1.89E+05 |
| Chrysophanol                                                 | 9.53E+04 | 2.65E+04 |
| cis-Aconitic acid                                            | 2.14E+05 | 5.19E+04 |
| CP 47,497 C8-homolog Negative Mode                           | 1.92E+05 | 5.56E+04 |
| Dodecanedioic acid                                           | 1.33E+05 | 4.51E+04 |
| D-Pantothenic Acid Hemicalcium Salt                          | 1.31E+05 | 3.83E+04 |
| D-Tagatose                                                   | 1.01E+06 | 1.51E+05 |
| D-Xylonic Acid Lithium Salt                                  | 1.03E+06 | 1.91E+05 |
| Estriol                                                      | 6.12E+05 | 1.51E+05 |
| Estrone                                                      | 2.74E+04 | 6.72E+03 |
| Ethyl dodecanoate                                            | 3.31E+04 | 8.89E+03 |
| Ethyl hexadecanoate1                                         | 1.10E+06 | 2.27E+05 |
| Fatty acid C20:4                                             | 7.57E+05 | 2.20E+05 |
| Formononetin                                                 | 2.87E+05 | 8.43E+04 |
| FURFURYL ALCOHOL                                             | 4.88E+06 | 3.42E+05 |

|                                         |          |          |
|-----------------------------------------|----------|----------|
| Genistein                               | 1.25E+05 | 2.58E+04 |
| GERANYL-PP                              | 1.97E+05 | 3.06E+04 |
| GLYCERALDEHYDE 3-PHOSPHATE              | 5.79E+04 | 1.71E+04 |
| Glycyrrhetic acid                       | 1.20E+05 | 3.12E+04 |
| GUANOSINE MONOPHOSPHATE                 | 5.98E+04 | 3.93E+03 |
| Hexadecanedioic acid                    | 1.94E+05 | 5.47E+04 |
| HEXADECANOL                             | 1.84E+05 | 6.54E+04 |
| HISTIDINE                               | 5.18E+04 | 2.05E+04 |
| Indoleacrylic acid                      | 8.94E+04 | 1.05E+04 |
| Inosine                                 | 3.16E+04 | 9.54E+03 |
| Isomaltose                              | 2.83E+06 | 6.02E+05 |
| ITACONATE                               | 3.96E+04 | 4.98E+03 |
| Kaempferol                              | 1.10E+05 | 2.62E+04 |
| KYNURENATE                              | 1.04E+04 | 1.10E+03 |
| L-3-Phenyllactic acid                   | 1.20E+05 | 3.63E+04 |
| L-Dihydroorotic acid                    | 1.70E+06 | 4.60E+05 |
| L-Theanine                              | 1.58E+05 | 5.05E+04 |
| L-TRYPTOPHANAMIDE                       | 2.78E+04 | 1.94E+03 |
| MALATE                                  | 1.44E+06 | 4.31E+05 |
| MALONATE                                | 9.19E+04 | 2.04E+04 |
| Maltotriose                             | 2.35E+05 | 7.27E+04 |
| MESOXALATE                              | 4.55E+04 | 5.40E+03 |
| Methotrexate                            | 1.24E+05 | 3.24E+04 |
| Methylinoleate                          | 5.80E+04 | 8.16E+03 |
| METHYLMALONATE                          | 3.06E+05 | 2.24E+04 |
| N,N-DIMETHYL-1,4-PHENYLENEDIAMINE       | 6.17E+04 | 1.04E+04 |
| N,N-DIMETHYLARGININE                    | 2.53E+05 | 1.82E+04 |
| N-ACETYLLALANINE                        | 2.22E+04 | 3.27E+03 |
| N-ACETYLGLUCOSAMINE                     | 1.08E+04 | 1.92E+03 |
| N-ACETYLGLUTAMATE                       | 4.21E+05 | 4.05E+04 |
| N-Acetyl-L-tryptophan                   | 1.80E+05 | 4.81E+04 |
| Nonadecanoic acid                       | 1.73E+05 | 4.42E+04 |
| Oligomycin B                            | 1.58E+06 | 1.89E+05 |
| Oxadipic Acid                           | 2.32E+05 | 7.44E+04 |
| OXOPROLINE                              | 1.01E+06 | 1.03E+05 |
| PALMITATE                               | 1.54E+06 | 3.91E+05 |
| PFBA (perfluoro-n-butanoic acid) (neg)  | 1.19E+05 | 3.48E+04 |
| PFHxS (perfluorohexane sulfonate) (neg) | 1.00E+06 | 2.22E+05 |
| PFOS (perfluorooctane sulfonate) (neg)  | 3.79E+04 | 3.86E+03 |
| PHENYL ACETATE                          | 8.13E+04 | 2.16E+04 |
| Phthalic acid                           | 4.17E+05 | 8.68E+04 |
| Protocatechuic acid                     | 5.40E+04 | 1.41E+04 |
| Protocatechuic Aldehyde                 | 7.79E+04 | 2.33E+04 |
| PYRIMIDINE                              | 1.75E+05 | 2.18E+04 |
| Quinic acid                             | 4.39E+06 | 1.33E+06 |
| RAFFINOSE                               | 7.76E+04 | 1.49E+04 |
| SACCHARATE                              | 4.14E+05 | 8.05E+04 |
| Sambucinol                              | 9.37E+04 | 1.03E+04 |
| SEBACATE                                | 3.67E+04 | 8.01E+03 |
| Shikimate 3-phosphate                   | 1.25E+05 | 3.02E+04 |
| STACHYOSE                               | 1.77E+06 | 3.62E+05 |
| SUBERATE                                | 6.24E+05 | 1.98E+05 |
| Sulfadoxine                             | 1.26E+05 | 2.88E+04 |
| Sulfamethazine                          | 6.47E+05 | 1.85E+05 |
| Syringic Acid                           | 4.12E+04 | 1.26E+04 |
| THYMIDINE-MONOPHOSPHATE                 | 1.01E+05 | 3.16E+04 |
| trans-Ferulic acid                      | 6.10E+05 | 1.68E+05 |
| Traumatic acid                          | 1.91E+05 | 5.24E+04 |

|                                 |          |          |
|---------------------------------|----------|----------|
| TREHALOSE                       | 2.33E+06 | 3.32E+05 |
| Turanose                        | 3.48E+04 | 2.99E+03 |
| TYROSINE                        | 1.73E+05 | 1.65E+04 |
| Undecanal                       | 2.86E+04 | 8.09E+03 |
| Undecanedioic acid              | 4.45E+05 | 1.28E+05 |
| URATE                           | 7.01E+04 | 9.90E+03 |
| Uridine                         | 1.91E+05 | 1.70E+04 |
| Vaccenic acid                   | 1.19E+06 | 2.75E+05 |
| VALINE                          | 6.58E+04 | 8.11E+03 |
| XANTHINE                        | 8.68E+04 | 8.94E+03 |
| Atractylenolide III             | 1.94E+04 | 5.14E+03 |
| Baohuoside I                    | 4.11E+06 | 1.12E+06 |
| Baohuoside I                    | 1.11E+07 | 2.85E+06 |
| Epibrassinolide +HCOOH          | 2.77E+05 | 7.85E+04 |
| Epimedin A +HCOOH               | 1.36E+06 | 3.62E+05 |
| Epimedin C                      | 8.11E+05 | 1.38E+05 |
| Aurantio-Obtusin                | 2.74E+05 | 7.38E+04 |
| Daidzin +HCOOH                  | 1.12E+05 | 3.17E+04 |
| Rehmannioside D +HCOOH          | 5.94E+05 | 1.96E+05 |
| Scopoletin                      | 9.26E+04 | 2.28E+04 |
| Pachymic acid                   | 6.57E+05 | 1.83E+05 |
| Liquiritin                      | 4.17E+06 | 1.03E+06 |
| Glycyrrhizic acid ammonium salt | 3.20E+07 | 4.58E+06 |
| Glabridin                       | 1.52E+05 | 3.94E+04 |
| Quercitrin                      | 3.52E+05 | 7.74E+04 |
| Quercetin                       | 1.94E+05 | 4.67E+04 |
| quercetin-3'-O-glucoside        | 2.49E+04 | 6.12E+03 |
| Phellodendrine                  | 2.85E+05 | 7.99E+04 |
| Isomucronulatol-7-O-glucoside   | 3.26E+05 | 9.45E+04 |
| Astragaloside I +HCOOH          | 1.29E+06 | 3.51E+05 |
| Astragaloside II +HCOOH         | 1.60E+06 | 4.94E+05 |
| Asiatic acid                    | 3.05E+04 | 7.30E+03 |
| Curcumin                        | 4.45E+05 | 1.30E+05 |
| Gingerglycolipid B +HCOOH       | 9.03E+04 | 2.50E+04 |
| Geniposidic acid                | 2.43E+05 | 6.48E+04 |
| L(+)-Arginine                   | 2.40E+05 | 8.40E+04 |
| Corosolic acid                  | 2.29E+05 | 6.42E+04 |
| PhillyrinForsythin +HCOOH       | 5.89E+04 | 1.44E+04 |
| Forsythoside A                  | 4.04E+04 | 7.12E+03 |
| Forsythoside B                  | 4.52E+05 | 1.17E+05 |
| Rutin                           | 6.33E+05 | 1.69E+05 |
| Ononin +HCOOH                   | 2.50E+06 | 7.05E+05 |
| mangiferin                      | 6.87E+06 | 1.58E+06 |
| Calycosin                       | 2.19E+06 | 6.32E+05 |
| Calycosin-7-o-glucoside +HCOOH  | 9.38E+05 | 2.72E+05 |
| Gallic acid                     | 4.78E+05 | 3.59E+04 |
| Calceorioside B                 | 2.20E+05 | 2.60E+04 |
| Luteolin-7-O-β-D-glucuronide    | 1.48E+05 | 3.49E+04 |
| Fungitetraose                   | 1.55E+06 | 1.82E+05 |
| Pseuoginsenoside F11            | 6.77E+04 | 1.59E+04 |
| guanosine                       | 5.63E+05 | 2.51E+04 |
| Limonin                         | 8.15E+05 | 1.96E+05 |
| Citric acid                     | 5.98E+06 | 1.36E+06 |
| arctiin +HCOOH                  | 4.84E+04 | 4.07E+03 |
| Gypenoside XVII                 | 2.26E+05 | 6.27E+04 |
| Oleanolic acid                  | 7.39E+04 | 1.35E+04 |
| Esculetin                       | 1.53E+05 | 4.95E+04 |
| 10-deacetylasperulosidic acid   | 1.15E+06 | 7.69E+04 |

|                                |          |          |
|--------------------------------|----------|----------|
| 10-deacetylasperulosidic acid  | 5.07E+04 | 6.87E+03 |
| Ginsenoside Rb1 +HCOOH         | 1.65E+06 | 4.17E+05 |
| Ginsenoside Rb2                | 1.71E+05 | 4.99E+04 |
| Ginsenoside Re +HCOOH          | 1.49E+06 | 4.30E+05 |
| Ginsenoside Rg1 +HCOOH         | 2.40E+05 | 6.20E+04 |
| Ginsenoside Rg2 +HCOOH         | 8.80E+05 | 2.80E+05 |
| Ginsenoside-Ro                 | 6.22E+05 | 1.80E+05 |
| DCistanoside D                 | 1.41E+05 | 4.37E+04 |
| Ft1 Notoginsenoside Ft1 +HCOOH | 1.98E+05 | 6.09E+04 |
| Phytolaccagenin                | 6.90E+05 | 1.29E+05 |
| Monotropein                    | 1.43E+03 | 4.63E+02 |
| Echinacoside                   | 1.66E+05 | 4.32E+04 |
| pinoresinol-glucoside          | 1.57E+05 | 3.99E+04 |
| Aspartic acid                  | 1.66E+05 | 5.99E+04 |
| Luteolin                       | 1.64E+05 | 4.43E+04 |
| Neochlorogenic acid            | 4.00E+04 | 9.28E+03 |
| Neo-mangiferin                 | 5.81E+06 | 1.57E+06 |
| Linoleic acid                  | 8.87E+05 | 2.35E+05 |
| Isoliquiritin                  | 8.51E+05 | 2.93E+05 |
| Isoliquiritigenin              | 1.72E+06 | 4.98E+05 |
| Isoquercitrin                  | 5.82E+05 | 1.12E+05 |
| Ciso-Cistanoside C             | 9.54E+04 | 2.91E+04 |
| Isorhamnetin                   | 2.54E+05 | 7.72E+04 |
| Cryptochlorogenic acid         | 3.40E+06 | 8.52E+05 |
| Naringenin                     | 1.56E+05 | 4.07E+04 |
| Tenuifoliside A                | 1.59E+05 | 4.85E+04 |
| Vinorelbine                    | 5.90E+05 | 1.58E+05 |
| Timosaponin BII +HCOOH         | 2.36E+03 | 5.51E+02 |
| Gardenoside                    | 1.57E+05 | 3.06E+04 |
| Raddeanin A                    | 1.68E+05 | 4.49E+04 |
| Catalpol                       | 5.35E+05 | 5.97E+04 |

| Adduct / Charge         | Precursor Mass | Component Name                          | Found At Mass |
|-------------------------|----------------|-----------------------------------------|---------------|
| [M-H]-                  | 711.302        | 711.3008 / 7.34                         | 711.3022      |
| [M-H]-                  | 131.072        | 131.0713 / 6.97                         | 131.0718      |
| [M-H]-                  | 243.162        | 243.1606 / 10.54                        | 243.16        |
| [M-H]-                  | 515.142        | 515.1412 / 5.69                         | 515.1423      |
| [M-H]-                  | 185.119        | 185.1184 / 8.88                         | 185.1181      |
| [2M-H]-                 | 659.476        | 659.4742 / 9.60 [2M-H]-                 | 659.4751      |
| [M-H]-                  | 511.344        | 511.3427 / 14.68                        | 511.3436      |
| [M-H]-                  | 295.229        | 295.2281 / 14.02                        | 295.2287      |
| [M-H]-                  | 99.926         | 99.9251 / 16.05                         | 99.9253       |
| [M-H]-                  | 151.041        | 151.0397 / 8.14                         | 151.0399      |
| [M-H]-                  | 205.161        | 205.1596 / 13.89                        | 205.1602      |
| [M-H]-                  | 683.438        | 683.4372 / 9.55                         | 683.4381      |
| [M+FA-H]-               | 829.497        | 829.4963 / 11.49 [M+FA-H]-              | 829.498       |
| [M-H]-                  | 117.056        | 117.0552 / 5.67                         | 117.0561      |
| [M-H]-                  | 159.104        | 159.1027 / 7.36 [M-H]-                  | 159.1029      |
| [M-H]-                  | 175.063        | 175.0616 / 6.21 [M-H]-                  | 175.0616      |
| [M-H]-                  | 153.021        | 153.0196 / 5.60                         | 153.0193      |
| [M-H]-                  | 165.057        | 165.0561 / 6.18 [M-H]-                  | 165.0562      |
| [M-H]-                  | 183.104        | 183.1030 / 7.30                         | 183.1032      |
| [M-H]-                  | 171.104        | 171.1033 / 8.08 [M-H]-                  | 171.1028      |
| [M-H]-                  | 161.047        | 161.0456 / 3.83 [M-H]-                  | 161.046       |
| [M-H]-                  | 96.961         | 96.9598 / 5.01                          | 96.96         |
| [M-H]-                  | 242.177        | 242.1760 / 9.54                         | 242.1761      |
| [M-H]-                  | 163.042        | 163.0405 / 7.29                         | 163.0405      |
| [M-H]-                  | 121.03         | 121.0292 / 6.96 [M-H]-                  | 121.0295      |
| [M-H]-                  | 137.025        | 137.0244 / 8.28                         | 137.0243      |
| [M-H]-                  | 161.062        | 161.0607 / 8.14                         | 161.0609      |
| [M-H <sub>2</sub> O-H]- | 129.02         | 129.0193 / 1.99 [M-H <sub>2</sub> O-H]- | 129.0197      |
| [M-H]-                  | 497.328        | 497.3267 / 11.68                        | 497.3276      |
| [M+FA-H]-               | 159.067        | 159.0664 / 6.95 [M+FA-H]-               | 159.0666      |
| [M-H]-                  | 623.2          | 623.1993 / 7.36                         | 623.1997      |
| [M-H]-                  | 328.047        | 328.0457 / 4.19                         | 328.0462      |
| [M-H]-                  | 145.051        | 145.0500 / 5.77 [M-H]-                  | 145.0513      |
| [M-H]-                  | 297.244        | 297.2431 / 14.51                        | 297.2437      |
| [M-H]-                  | 311.17         | 311.1689 / 16.49                        | 311.1701      |
| [M-H]-                  | 303.234        | 303.2328 / 15.50 [M-H]-                 | 303.2337      |
| [M-H]-                  | 131.048        | 131.0465 / 0.90                         | 131.0466      |
| [M-H]-                  | 187.099        | 187.0981 / 7.94                         | 187.0982      |
| [M-H]-                  | 171.068        | 171.0666 / 7.50                         | 171.067       |
| [M-H]-                  | 236.058        | 236.0570 / 6.04                         | 236.0578      |
| [M+Na-2H]-              | 179.036        | 179.0353 / 6.61 [M+Na-2H]-              | 179.0353      |
| [M]-                    | 354.092        | 354.0911 / 6.28 [M]-                    | 354.0918      |
| [M-H]-                  | 253.052        | 253.0505 / 12.00                        | 253.051       |
| [M+Na-2H]-              | 173.01         | 173.0090 / 1.36 [M+Na-2H]-              | 173.0097      |
| [M-H]-                  | 331.25         | 331.2484 / 9.51 [M-H]-                  | 331.2488      |
| [M+AcO-H]-              | 229.146        | 229.1450 / 9.94 [M+AcO-H]-              | 229.1448      |
| [M-H]-                  | 218.104        | 218.1031 / 5.49                         | 218.1034      |
| [M-H]-                  | 179.057        | 179.0563 / 1.03 [M-H]-                  | 179.0563      |
| [M-H]-                  | 165.042        | 165.0407 / 0.96 [M-H]-                  | 165.0407      |
| [M-H]-                  | 287.224        | 287.2227 / 9.90                         | 287.223       |
| [M-H]-                  | 269.25         | 269.2485 / 16.80                        | 269.249       |
| [M-H]-                  | 227.202        | 227.2013 / 15.16                        | 227.2022      |
| [M-H]-                  | 283.266        | 283.2652 / 17.43 [M-H]-                 | 283.2654      |
| [M-H]-                  | 303.161        | 303.1602 / 10.78                        | 303.1605      |
| [M-H]-                  | 267.067        | 267.0660 / 10.78                        | 267.0664      |
| [M-H]-                  | 96.961         | 96.9600 / 1.38 [M-H]-                   | 96.9604       |

|                         |         |                  |                                  |
|-------------------------|---------|------------------|----------------------------------|
| [M-H]-                  | 269.214 | 269.2126 / 12.46 | 269.2128                         |
| [M-H]-                  | 313.24  | 313.2385 / 11.01 | [M-H]- 313.2387                  |
| [M-H]-                  | 169.088 | 169.0871 / 9.89  | 169.0875                         |
| [M-H]-                  | 469.334 | 469.3328 / 14.03 | 469.3332                         |
| [M-H]-                  | 362.052 | 362.0506 / 4.23  | 362.0515                         |
| [M-H]-                  | 285.207 | 285.2060 / 12.35 | 285.2064                         |
| [2M-H]-                 | 483.248 | 483.2462 / 6.77  | [2M-H]- 483.2476                 |
| [M-H]-                  | 154.064 | 154.0624 / 0.89  | 154.0624                         |
| [M-H]-                  | 186.042 | 186.0411 / 2.41  | 186.0416                         |
| [M-H]-                  | 267.074 | 267.0733 / 5.15  | 267.0733                         |
| [M+Cl]-                 | 377.086 | 377.0854 / 1.05  | [M+Cl]- 377.0856                 |
| [M-H <sub>2</sub> O-H]- | 129.02  | 129.0194 / 2.89  | [M-H <sub>2</sub> O-H]- 129.0198 |
| [M-H]-                  | 285.042 | 285.0411 / 9.44  | 285.0405                         |
| [M-H]-                  | 188.094 | 188.0926 / 3.56  | 188.0932                         |
| [M-H]-                  | 165.057 | 165.0560 / 7.39  | 165.0559                         |
| [M-H]-                  | 157.052 | 157.0510 / 6.77  | [M-H]- 157.0513                  |
| [M-H]-                  | 173.12  | 173.1190 / 8.10  | 173.1184                         |
| [M-H]-                  | 202.11  | 202.1085 / 4.39  | 202.1092                         |
| [M-H]-                  | 133.016 | 133.0145 / 1.27  | [M-H]- 133.0146                  |
| [M-H]-                  | 103.005 | 103.0035 / 1.34  | 103.0037                         |
| [M-H]-                  | 503.163 | 503.1621 / 1.05  | [M-H]- 503.1614                  |
| [M-H]-                  | 116.929 | 116.9283 / 8.84  | 116.9284                         |
| [M-H]-                  | 453.193 | 453.1915 / 12.05 | 453.1926                         |
| [M-H]-                  | 293.181 | 293.1795 / 16.53 | [M-H]- 293.1804                  |
| [M-H]-                  | 117.02  | 117.0193 / 2.73  | 117.0195                         |
| [M-H]-                  | 134.895 | 134.8941 / 18.20 | 134.8945                         |
| [M-H]-                  | 201.061 | 201.0596 / 3.91  | 201.0602                         |
| [M-H]-                  | 130.088 | 130.0873 / 2.85  | 130.0875                         |
| [M-H]-                  | 220.148 | 220.1467 / 14.47 | 220.1469                         |
| [M-H]-                  | 188.058 | 188.0568 / 2.81  | 188.0571                         |
| [M-H]-                  | 245.095 | 245.0938 / 7.46  | [M-H]- 245.0942                  |
| [M-H]-                  | 297.243 | 297.2418 / 13.44 | 297.2426                         |
| [M-H <sub>2</sub> O-H]- | 805.406 | 805.4044 / 10.97 | [M-H <sub>2</sub> O-H] 805.4051  |
| [M-H]-                  | 159.104 | 159.1030 / 8.58  | 159.1027                         |
| [M-H]-                  | 128.037 | 128.0356 / 2.41  | 128.0358                         |
| [M-H]-                  | 255.235 | 255.2336 / 16.27 | [M-H]- 255.2337                  |
| [M-H]-                  | 213.114 | 213.1134 / 10.18 | 213.1135                         |
| [2M-H]-                 | 799.272 | 799.2701 / 7.50  | [2M-H]- 799.2708                 |
| [M-H]-                  | 499.169 | 499.1675 / 3.41  | 499.1683                         |
| [M-H]-                  | 134.895 | 134.8942 / 16.42 | 134.8945                         |
| [M-H]-                  | 165.021 | 165.0197 / 6.51  | 165.0197                         |
| [M-H]-                  | 153.02  | 153.0193 / 6.36  | 153.0196                         |
| [M-H]-                  | 137.025 | 137.0243 / 6.22  | [M-H]- 137.0244                  |
| [M-H]-                  | 78.96   | 78.9589 / 0.94   | 78.9591                          |
| [M-H]-                  | 191.058 | 191.0567 / 1.09  | [M-H]- 191.0567                  |
| [M-H]-                  | 503.178 | 503.1770 / 6.62  | 503.1783                         |
| [M-H]-                  | 209.068 | 209.0670 / 1.20  | [M-H]- 209.0671                  |
| [M-H]-                  | 265.15  | 265.1486 / 15.88 | 265.1487                         |
| [M-H]-                  | 201.079 | 201.0775 / 6.41  | 201.0778                         |
| [M-H <sub>2</sub> O-H]- | 253.218 | 253.2173 / 15.38 | [M-H <sub>2</sub> O-H] 253.2176  |
| [M-H <sub>2</sub> O-H]- | 665.216 | 665.2152 / 1.16  | [M-H <sub>2</sub> O-H]- 665.2154 |
| [M+AcO-H]-              | 173.083 | 173.0823 / 7.23  | [M+AcO-H]- 173.0824              |
| [M-H]-                  | 309.208 | 309.2070 / 12.52 | 309.2078                         |
| [M-H]-                  | 277.219 | 277.2179 / 15.02 | [M-H]- 277.2183                  |
| [M+FA-H]-               | 197.047 | 197.0458 / 6.84  | [M+FA-H]- 197.0461               |
| [M-H]-                  | 321.114 | 321.1132 / 11.22 | 321.1134                         |
| [M-H]-                  | 193.052 | 193.0510 / 7.50  | [M-H]- 193.0508                  |
| [M-H]-                  | 227.13  | 227.1289 / 9.58  | 227.1291                         |

|                         |         |                  |                         |          |
|-------------------------|---------|------------------|-------------------------|----------|
| [M-H]-                  | 341.11  | 341.1093 / 1.19  | [M-H]-                  | 341.1092 |
| [M+FA-H]-               | 387.116 | 387.1145 / 4.93  | [M+FA-H]-               | 387.1154 |
| [M-H]-                  | 180.068 | 180.0665 / 3.16  |                         | 180.0674 |
| [M-H]-                  | 169.125 | 169.1235 / 10.17 | [M-H]-                  | 169.1234 |
| [M-H]-                  | 215.13  | 215.1293 / 9.29  | [M-H]-                  | 215.1292 |
| [M-H]-                  | 167.022 | 167.0210 / 2.37  |                         | 167.0217 |
| [M+FA-H]-               | 289.069 | 289.0677 / 3.49  | [M+FA-H]-               | 289.0687 |
| [M-H]-                  | 281.25  | 281.2488 / 16.42 |                         | 281.2493 |
| [M-H]-                  | 115.921 | 115.9204 / 10.53 | [M-H]-                  | 115.9201 |
| [M-H]-                  | 151.027 | 151.0261 / 3.07  | [M-H]-                  | 151.0268 |
| [M-H]-                  | 247.135 | 247.1343 / 11.38 |                         | 247.1347 |
| [M-H]-                  | 513.178 | 513.1768 / 8.64  |                         | 513.1771 |
| [M-H]-                  | 513.178 | 513.1769 / 10.85 |                         | 513.1772 |
| [M-H]-                  | 525.36  | 525.3586 / 15.06 |                         | 525.3596 |
| [M+FA-H]-               | 883.292 | 883.2913 / 8.31  | [M+FA-H]-               | 883.2921 |
| [M-H]-                  | 821.291 | 821.2897 / 8.45  |                         | 821.2902 |
| [M+AcO-H]-              | 329.067 | 329.0664 / 9.48  | [M+AcO-H]-              | 329.0667 |
| [M-H]-                  | 461.168 | 461.1666 / 6.60  |                         | 461.1676 |
| [M-H]-                  | 731.228 | 731.2264 / 5.25  |                         | 731.2273 |
| [M-H]-                  | 191.037 | 191.0354 / 7.57  | [M-H]-                  | 191.0351 |
| [M-H]-                  | 527.377 | 527.3756 / 15.28 |                         | 527.376  |
| [M-H]-                  | 417.121 | 417.1200 / 7.26  | [M-H]-                  | 417.1204 |
| [M-H]-                  | 821.398 | 821.3966 / 9.97  | [M-H]-                  | 821.3975 |
| [M-H]-                  | 323.13  | 323.1287 / 11.98 | [M-H]-                  | 323.1292 |
| [M-H]-                  | 447.094 | 447.0933 / 7.65  |                         | 447.0939 |
| [M-H]-                  | 301.036 | 301.0349 / 8.78  |                         | 301.0358 |
| [M-H]-                  | 463.219 | 463.2184 / 7.77  | [M-H]-                  | 463.2201 |
| [M+FA-H]-               | 386.163 | 386.1616 / 6.59  | [M+FA-H]-               | 386.1618 |
| [M-H]-                  | 463.162 | 463.1607 / 8.54  |                         | 463.161  |
| [M+FA-H]-               | 913.484 | 913.4827 / 11.57 | [M+FA-H]-               | 913.4829 |
| [M-H]-                  | 871.473 | 871.4723 / 10.27 | [M-H]-                  | 871.4729 |
| [M-H]-                  | 487.344 | 487.3425 / 11.28 | [M-H]-                  | 487.344  |
| [M-H]-                  | 367.105 | 367.1034 / 7.69  | [M-H]-                  | 367.104  |
| [M-H]-                  | 723.383 | 723.3823 / 12.38 |                         | 723.3839 |
| [M-H]-                  | 373.116 | 373.1146 / 5.49  |                         | 373.1138 |
| [M-H]-                  | 173.106 | 173.1049 / 0.89  | [M-H]-                  | 173.1046 |
| [M-H]-                  | 471.347 | 471.3462 / 12.91 |                         | 471.3476 |
| [M+TFA-H]-              | 579.209 | 579.2080 / 8.32  | [M+TFA-H]-              | 579.2096 |
| [M-H]-                  | 623.222 | 623.2206 / 5.43  |                         | 623.2218 |
| [M-H]-                  | 755.425 | 755.4241 / 10.78 |                         | 755.424  |
| [M-H]-                  | 609.148 | 609.1466 / 7.06  |                         | 609.1471 |
| [M-H]-                  | 475.126 | 475.1247 / 8.17  |                         | 475.1255 |
| [M-H]-                  | 421.08  | 421.0785 / 6.49  | [M-H]-                  | 421.079  |
| [M-H]-                  | 283.062 | 283.0614 / 8.79  |                         | 283.0617 |
| [M-H]-                  | 491.122 | 491.1205 / 7.17  |                         | 491.1206 |
| [M-H]-                  | 169.016 | 169.0150 / 4.72  | [M-H]-                  | 169.0147 |
| [M-H]-                  | 477.126 | 477.1247 / 5.47  |                         | 477.1247 |
| [M+TFA-H]-              | 461.073 | 461.0720 / 7.22  | [M+TFA-H]-              | 461.0732 |
| [M+FA-H]-               | 711.224 | 711.2228 / 2.88  | [M+FA-H]-               | 711.2231 |
| [M-H]-                  | 799.488 | 799.4869 / 9.05  | [M-H]-                  | 799.4875 |
| [M-H]-                  | 282.086 | 282.0849 / 4.35  |                         | 282.0851 |
| [M-H]-                  | 469.186 | 469.1848 / 10.47 | [M-H]-                  | 469.1856 |
| [M-H <sub>2</sub> O-H]- | 191.021 | 191.0201 / 1.31  | [M-H <sub>2</sub> O-H]- | 191.0205 |
| [M-H]-                  | 579.287 | 579.2861 / 16.46 | [M-H]-                  | 579.2871 |
| [M-H]-                  | 945.545 | 945.5438 / 9.77  | [M-H]-                  | 945.5447 |
| [M-H]-                  | 455.355 | 455.3538 / 15.57 |                         | 455.3548 |
| [M-H]-                  | 177.02  | 177.0192 / 6.61  |                         | 177.0199 |
| [M-H]-                  | 389.11  | 389.1092 / 3.55  | [M-H]-                  | 389.1094 |

|                         |          |                  |                         |           |
|-------------------------|----------|------------------|-------------------------|-----------|
| [M-H <sub>2</sub> O-H]- | 389.146  | 389.1451 / 6.00  | [M-H <sub>2</sub> O-H]- | 389.1458  |
| [M-H]-                  | 1153.605 | 1153.6038 / 9.09 | [M-H]-                  | 1153.606  |
| [M-H]-                  | 1077.588 | 1077.5864 / 9.26 | [M-H]-                  | 1077.5884 |
| [M-H]-                  | 991.553  | 991.5524 / 7.92  |                         | 991.5525  |
| [M-H]-                  | 845.494  | 845.4924 / 7.98  | [M-H]-                  | 845.4933  |
| [M-H <sub>2</sub> O-H]- | 829.499  | 829.4982 / 9.41  | [M-H <sub>2</sub> O-H]- | 829.4988  |
| [M-2H] <sub>2</sub> -   | 955.494  | 955.4931 / 9.37  | [M-2H] <sub>2</sub> -   | 955.4948  |
| [M-H]-                  | 651.232  | 651.2311 / 8.35  |                         | 651.2317  |
| [3M+K-2H]-              | 961.544  | 961.5416 / 10.26 | [3M+K-2H]-              | 961.5415  |
| [4M+2K-3H]-             | 531.176  | 531.1730 / 7.00  | [4M+2K-3H]-             | 531.1731  |
| [M-H]-                  | 389.11   | 389.1088 / 4.24  | [M-H]-                  | 389.1089  |
| [M-H]-                  | 785.254  | 785.2530 / 6.47  | [M-H]-                  | 785.2544  |
| [M+FA-H]-               | 565.193  | 565.1922 / 7.46  | [M+FA-H]-               | 565.1937  |
| [M-H]-                  | 132.032  | 132.0304 / 0.90  |                         | 132.0307  |
| [M-H]-                  | 285.041  | 285.0403 / 8.73  |                         | 285.041   |
| [M-H]-                  | 353.146  | 353.1450 / 6.42  |                         | 353.1459  |
| [M+Cl]-                 | 583.133  | 583.1319 / 5.93  | [M+Cl]-                 | 583.1323  |
| [M-H]-                  | 279.235  | 279.2335 / 15.66 | [M-H]-                  | 279.2336  |
| [M-H]-                  | 417.12   | 417.1190 / 8.09  |                         | 417.1192  |
| [M-H]-                  | 255.067  | 255.0661 / 9.88  | [M-H]-                  | 255.0663  |
| [M-H]-                  | 463.088  | 463.0870 / 7.26  | [M-H]-                  | 463.0887  |
| [M-H]-                  | 637.217  | 637.2159 / 7.84  | [M-H]-                  | 637.2158  |
| [M-H]-                  | 315.255  | 315.2536 / 12.49 |                         | 315.2544  |
| [M-H]-                  | 353.089  | 353.0876 / 6.24  | [M-H]-                  | 353.0886  |
| [M-H]-                  | 271.063  | 271.0614 / 9.31  |                         | 271.0614  |
| [M-H]-                  | 681.298  | 681.2966 / 15.57 |                         | 681.2983  |
| [M-H]-                  | 777.41   | 777.4086 / 10.60 | [M-H]-                  | 777.4087  |
| [M-H]-                  | 965.428  | 965.4270 / 8.68  | [M-H]-                  | 965.4202  |
| [M-H]-                  | 403.126  | 403.1250 / 5.50  |                         | 403.1253  |
| [M+Br]-                 | 895.396  | 895.3952 / 8.77  | [M+Br]-                 | 895.3966  |
| [M-H]-                  | 407.121  | 407.1198 / 2.27  |                         | 407.1198  |
