# Supplementary figures and images for: Based on Network Pharmacology‐Quercetin, a Component of Fuzheng Yiliu Decoction Suppressed Prostate Cancer by Regulating PI3K/AKT Pathway
Source: Hindawi journal article supplement (doi:10.1155/2023/1445953), 2023-01-01

# Positive

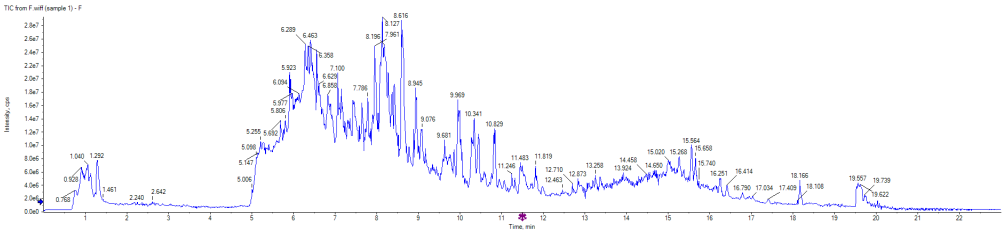

# Negative

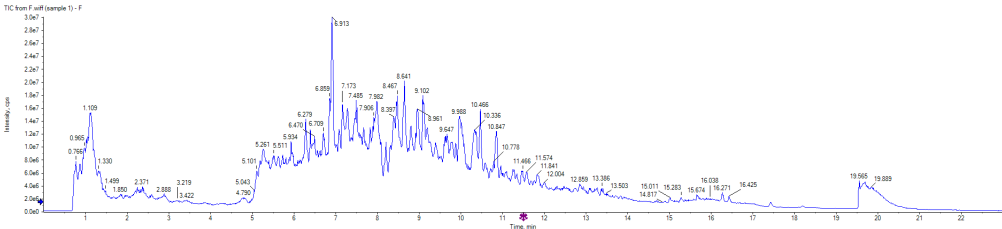

Supplement: f1 [file 1445953.f1.pdf]
